# Supplementary material
Source: publisher figshare collection journal article supplement (https://acs.figshare.com/ndownloader/files/5150197)
Supplement: Supplementary file 1 [file 5150197]

Supporting information to:

# Improvement in the luminescence properties and processability of $\text{LaF}_3\text{:Ln}$ and $\text{LaPO}_4\text{:Ln}$ nanoparticles by surface modification

*Jan W. Stouwdam<sup>a</sup> and Frank C. J. M. van Veggel<sup>\*a</sup>*

Laboratories of Supramolecular Chemistry and Technology & MESA<sup>+</sup> Research Institute

University of Twente, P.O. Box 217, 7500 AE Enschede, The Netherlands

<sup>a)</sup> Current address: University of Victoria, Department of Chemistry, P.O. Box 3065,  
Victoria, BC, Canada V8W 3V6.

E-mail: [fvv@uvic.ca](mailto:fvv@uvic.ca)

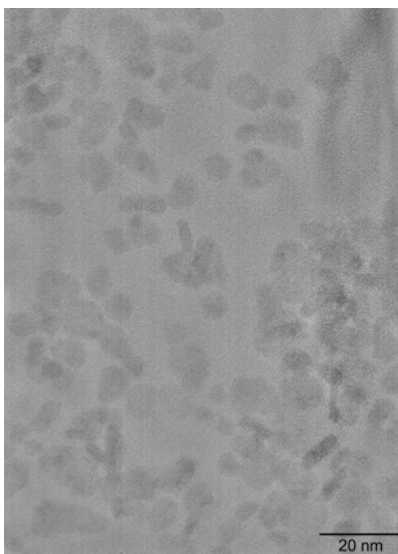

**Figure S1**

**Figure S1:** Tem picture of  $\text{LaF}_3:\text{Nd}$  nanoparticles synthesized with ligand **2**.

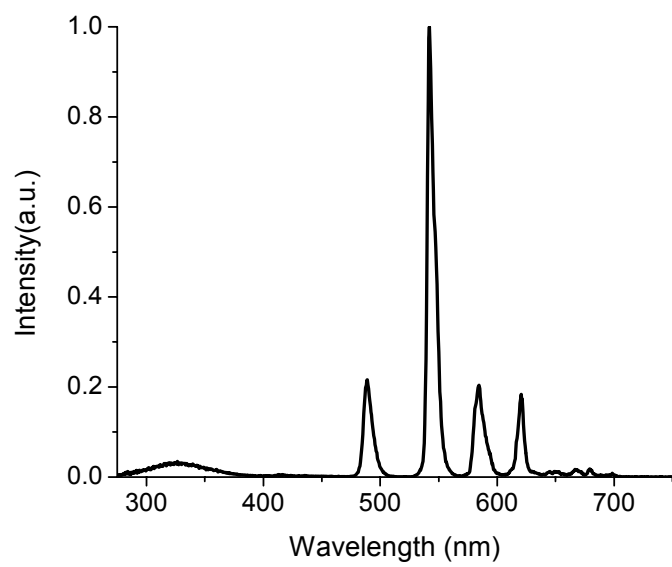

**Figure S2**

**Figure S2:** Emission spectrum of (La<sub>0.4</sub>Ce<sub>0.45</sub>)F<sub>3</sub>Tb<sub>0.15</sub> nanoparticles in dichloromethane ( $\lambda_{\text{ex.}}$  250 nm)
